# Supplementary material
Source: publisher figshare collection journal article supplement (https://acs.figshare.com/ndownloader/files/26232025)
Supplement: Supplementary file 1 [file 26232025]

## Supplementary Information

### Thin Films of SiP Lamellar Alloys: a First Step Towards 2D SiP

S. Geiskopf<sup>1</sup>, A. Valdenaire<sup>1</sup>, M. Stoffel<sup>1,\*</sup>, X. Devaux<sup>1</sup>, E. André<sup>2</sup>, C. Carteret<sup>2</sup>, A. Bouché<sup>1</sup>,  
M. Vergnat<sup>1</sup>, H. Rinnert<sup>1</sup>

<sup>1</sup> Université de Lorraine, CNRS, IJL, F-54000 Nancy, France

<sup>2</sup> Université de Lorraine, CNRS, LCPME, F-54000 Nancy, France

Figure S1 shows grazing incidence X-ray diffraction patterns for Si:P thin films containing 0 at.% of P (black solid line, reference sample), 25 at.% of P (green solid line) and 40 at. % of P (blue solid line) after annealing at 1100°C for 5 minutes.

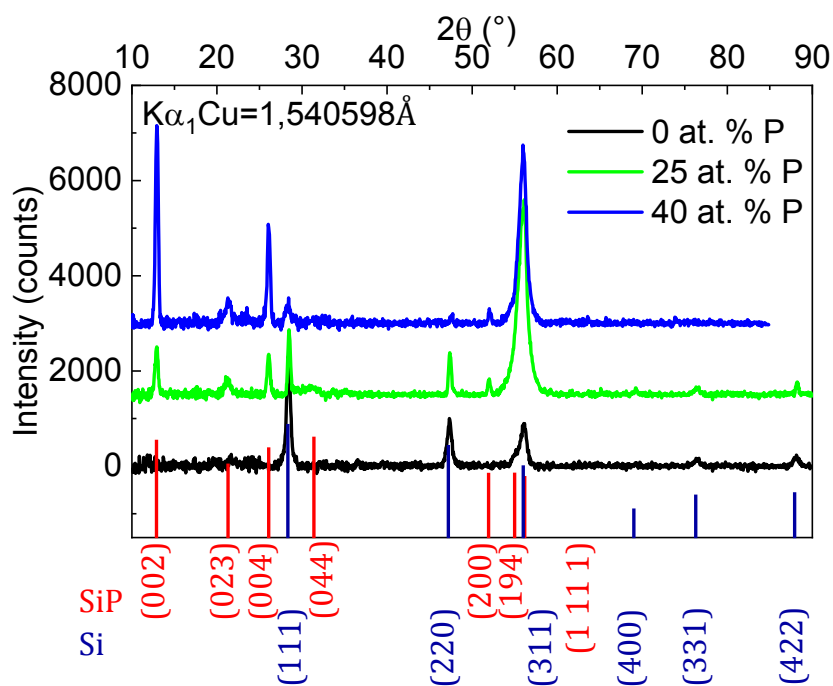

**Figure S1:** Grazing incidence X-ray diffraction patterns for Si:P thin films containing 0 at.% of P (black solid line), 25 at. % of P (green solid line) and 40 at. % of P (blue solid line) after annealing at 1100°C for 5 minutes. The blue and red vertical lines indicate the diffraction peaks associated with Si and orthorhombic SiP, respectively.

The incidence angle was fixed at  $2^\circ$  to minimize the contribution from the Si(001) substrate. In this case, Si:P thin films, which are not overgrown with SiO<sub>2</sub>, are considered. For the reference sample, one can clearly identify several peaks at  $28.4^\circ$ ;  $47.3^\circ$ ;  $56.1^\circ$ ;  $69.1^\circ$ ;  $76.4^\circ$  and  $88^\circ$  which correspond to the (111), (220), (311), (400), (331) and (422) reflections of crystalline Si (JCPDS file 00-026-1481). These reflections originate from Si present in the thin film. The relative intensities suggest a random crystallization of the Si grains in the films without particular texturing. For the samples containing 25 at.% of P and 40 at. % of P, the Si-related peaks are still present but additional peaks can be identified at  $13^\circ$ ;  $21.4^\circ$ ;  $26.2^\circ$ ;  $31.5^\circ$ ,  $52.1^\circ$ ,  $54.9^\circ$  and  $56^\circ$ . The latter correspond to the (002), (023), (004), (044), (200), (194) and (1 11 1) directions of orthorhombic SiP (JCPDS file 01-073-1251). X-ray diffraction measurements thus confirm the presence of both Si and SiP areas in our thin films.

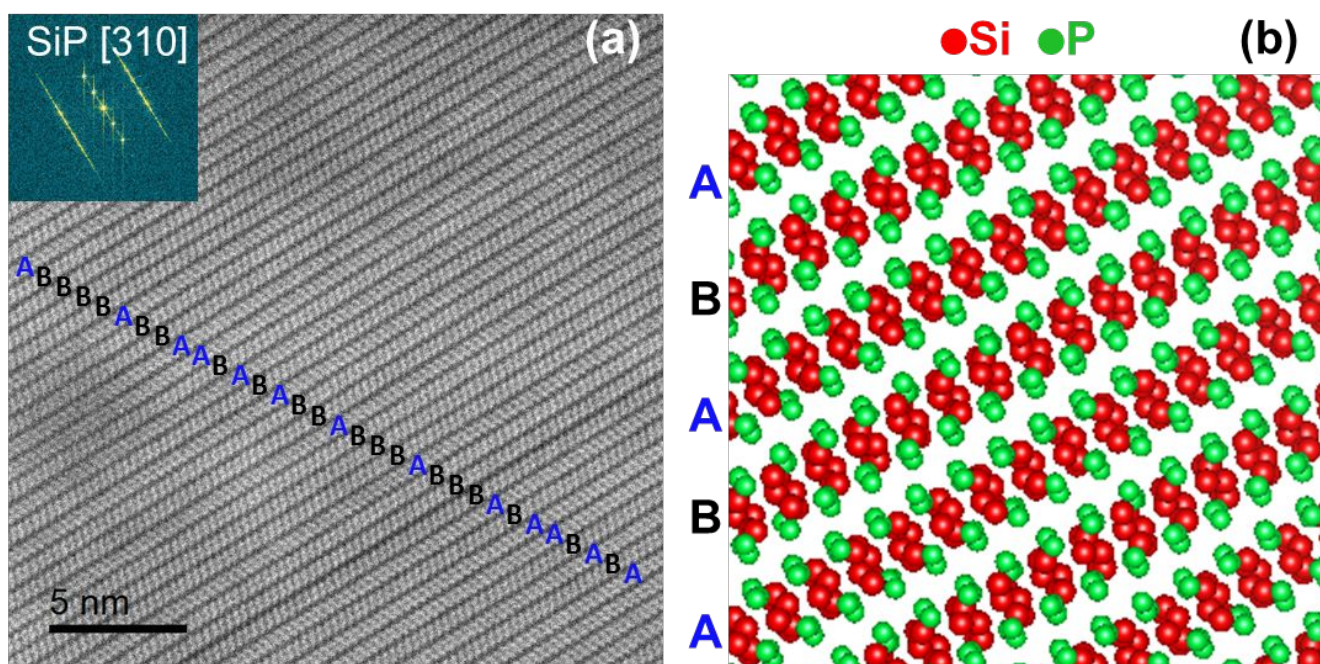

Figure S2: STEM-HAADF image of a SiP grain oriented along the [310] zone axis. The corresponding Fourier transform is shown in the inset. The atomic structure along the [310] zone axis direction is shown in (b). The normal structure can be described as the repeating stacking of A- type and B- type layers. Staking faults are clearly visible in the grain.

Figure S2 shows a STEM-HAADF image of a SiP grain oriented along the  $[310]$  zone axis. One can observe a chevron-like shape alternating from one atomic row to the next one. To get a better insight into the microstructure, we have taken a FFT of the SiP grain (see inset of fig. S2(a)). A good agreement is found when assuming an orthorhombic structure for SiP. The atomic structure oriented along the  $[310]$  zone axis is shown in Fig. S2(b). In this case also, one can notice the presence of stacking faults when following the A and B type layers. Sometimes, even three to four rows are found to have the same chevron orientation (see the sequence indicated in Fig. S2(a)).
